# Supplementary material for: TRIM27 acts as an oncogene and regulates cell proliferation and metastasis in non-small cell lung cancer through SIX3-β-catenin signaling
Source: Aging (Albany NY). 2020 Dec 2;12(24):25564–80. doi: 10.18632/aging.104163 (PMC7803540; doi:10.18632/aging.104163)
Supplement: Supplementary Figures [file aging-12-104163-s001.pdf]

SUPPLEMENTARY FIGURES

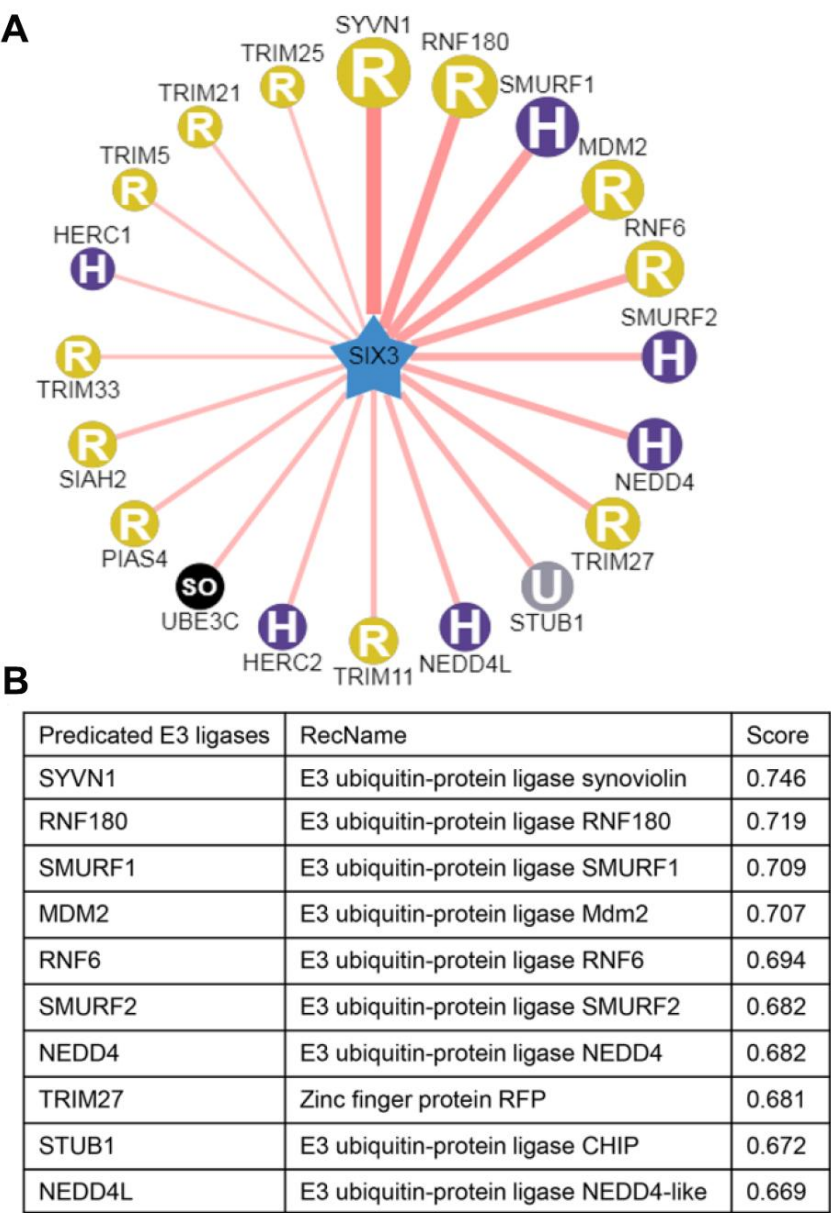

**Supplementary Figure 1. SIX3 is bioinformatically predicted to be a substrate interacted with human E3 ubiquitin ligases. (A)** Top 20 predicated human E3 ubiquitin ligases interact with SIX3. **(B)** Middle confidence interaction ( $0.001 \leq P < 0.01$ ) between SIX3 and human E3 ubiquitin ligases.

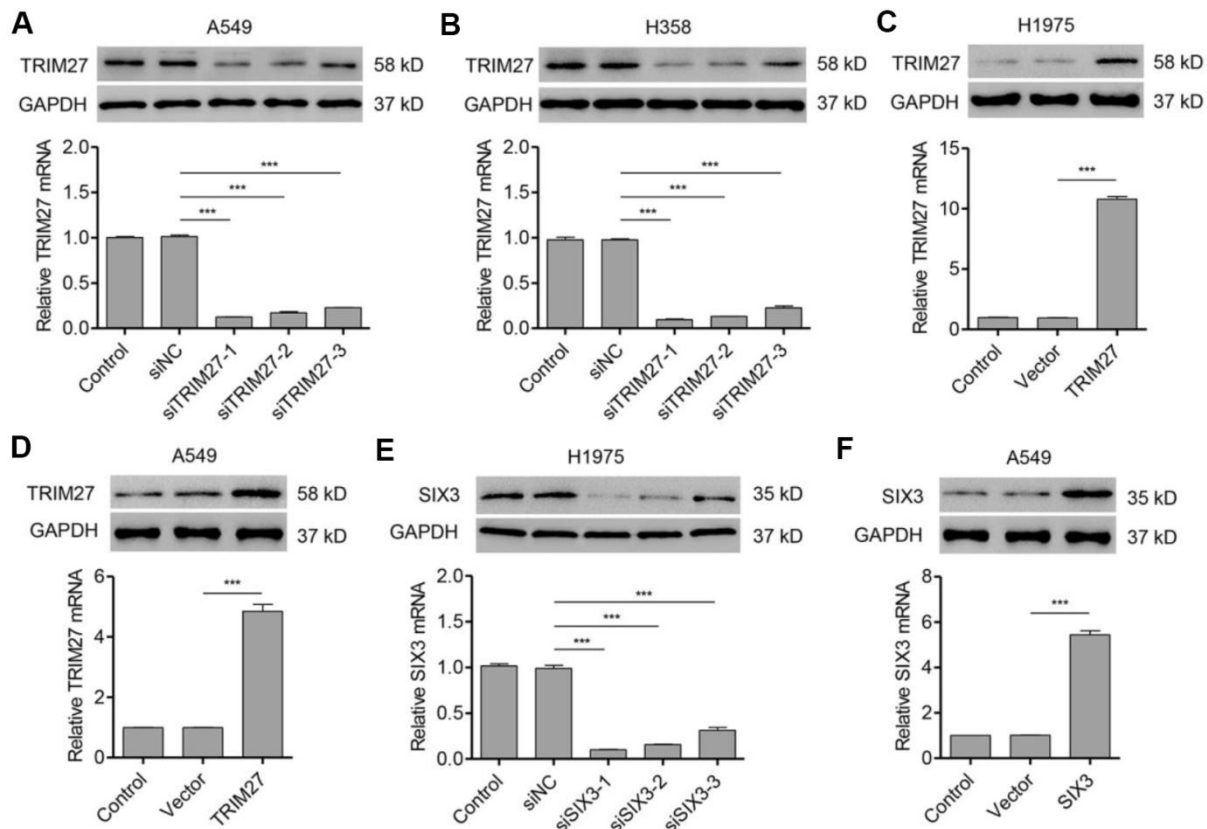

**Supplementary Figure 2. TRIM27 and SIX3 expression in NSCLC cell lines.** (A, B) A549 and H358 cells were transfected with siTRIM27-1, siTRIM27-2, siTRIM27-3, or siNC, and the expression of TRIM27 was measured by western blotting. (C, D) H1975 and A549 cells transfected with blank pLVX-Puro vector or pLVX-Puro-TRIM27, and the expression of TRIM27 was measured by western blotting. (E, F) H1975 cells were transfected with siSIX3-1, siSIX3-2, siSIX3-3, or siNC while A549 cells were transfected with blank pLVX-Puro vector or pLVX-Puro-SIX3, and the expression of SIX3 was measured by western blotting. All experiments were repeated at least three times, and data are represented as mean  $\pm$  SD. \*\*\* $P$  < 0.001 (one-way ANOVA followed by Dunnett's test).

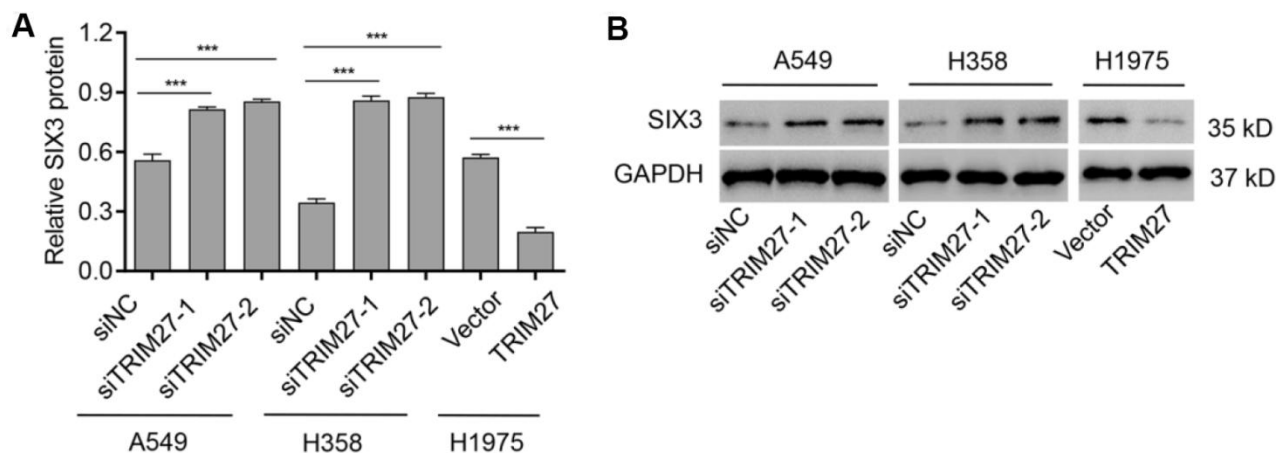

**Supplementary Figure 3. SIX3 expression in NSCLC cell lines under TRIM27 knockdown or overexpression.** (A, B) H358 and A549 cells were transfected with siTRIM27-1, siTRIM27-2, or siNC while H1975 cells were infected with pLVX-Puro-TRIM27 or blank pLVX-Puro vector, and the SIX3 expression levels were determined by western blotting. All experiments were repeated at least three times, and data are represented as mean  $\pm$  SD. \*\*\* $P$  < 0.001 (one-way ANOVA followed by Dunnett's test).
